# Supplementary material for: Bandgap engineering through nanoporosity
Source: Royal Society of Chemistry journal article supplement (doi:10.1039/c3nr04028c), 2013-10-23
Supplement: c3nr04028c_2.pdf [file c3nr04028c_2.pdf]

## Supplemental Information:

### Bandgap Engineering through Nanoporosity in ZnO

Ilker Demiroglu<sup>1</sup>, Sergio Tosoni<sup>1</sup>, Francesc Illas<sup>1</sup>, Stefan T. Bromley<sup>1,2\*</sup>

<sup>1</sup> *Departament de Química Física and Institut de Química Teòrica i Computacional, Universitat de Barcelona (IQTCUB), E-08028 Barcelona, Spain*

<sup>2</sup> *Institució Catalana de Recerca i Estudis Avançats (ICREA), 08010 Barcelona, Spain*

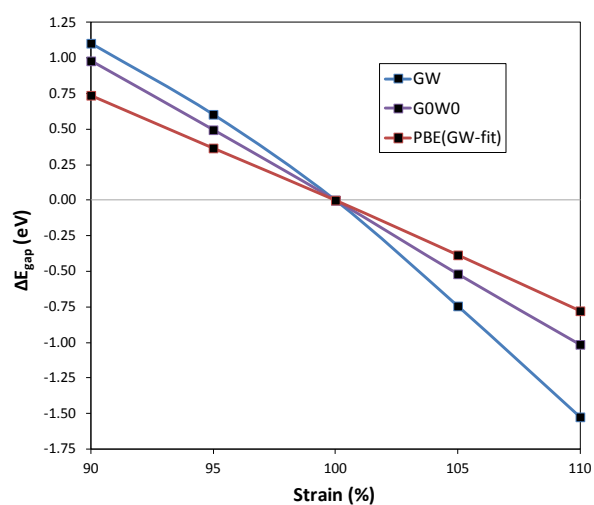

$\Delta E_{\text{gap}}$  versus strain for wz-ZnO calculated at various levels of theory. The linear fit to the GW data for porous non-strained structures has been applied to the DFT PBE data.
